# Supplementary material
Source: MDPI journal article supplement (https://www.mdpi.com/2673-4583/10/1/41)
Supplement: s1 [file s1]

# Wildlife Parasitoids of Citrus Pest (Orange and Lemon Trees) in Mostaganem

Aicha Merzoug<sup>1</sup>, Malika Boualeml and Faouzia Haffari<sup>1</sup>

<sup>1</sup>. Plant protection laboratory, Faculty of Natural and Life Sciences, Department of Agronomy, Abdelhamid Ibn Badis University of Mostaganem, Algeria.

E-mail: [nawel.merzoug@yahoo.com](mailto:nawel.merzoug@yahoo.com) [boualemmalika@yahoo.fr](mailto:boualemmalika@yahoo.fr) [fouzia.haffari@yahoo.com](mailto:fouzia.haffari@yahoo.com)

## Introduction:

Parasitoid characterize insects that develop as larvae on the tissues of other arthropods (typically insects) and then kill them [1]. Adult female parasitoids aggressively search for hosts and lay their eggs in, on, or near them. The larvae begin feeding on host tissues as soon as they hatch and finish their development either within the host (endoparasitoids) or on the host (ectoparasitoids). Solitary parasitoids grow in or on their hosts alone, whereas gregarious species grow in groups from eggs produced during one or more ovipositions. Insect parasitoids account for at least 14% of the world's one million or so insect species [3]. The adult female parasitoid usually locates and oviposits into the host. Most parasitic species are limited to a single life stage (egg, larva, pupa, adult) and a small number of species. Shared ecology, host taxonomy, and whether the parasitoid develops internally or externally in its host are all factors that determine host range [4,6]. Because of their diversity and the high levels of parasitism they frequently impose on host populations, parasitoids have become popular subjects for ecological research. From the practical standpoint, they have proven to be extremely effective biological control agents against agricultural pests. This research considering be sufficient for an effective first step in learning about auxiliary insects in order to establish proper breeding methods and then carry out a biological control.

## Material and Method

### 1- Presentation of the sites:

The current project was carried out on three Citrus orchards in the Mazagran region, totaling 30 trees : Mostaganem Algeria .

### 2- Sampling method:

For lemon and orange trees, the process entails collecting three leaves from each of the tree's four cardinal points : well as the center. The samples are analyzed in the laboratory using a binocular magnifying glass.

All adult parasitoid was placed in alcohol 70 % for identification.

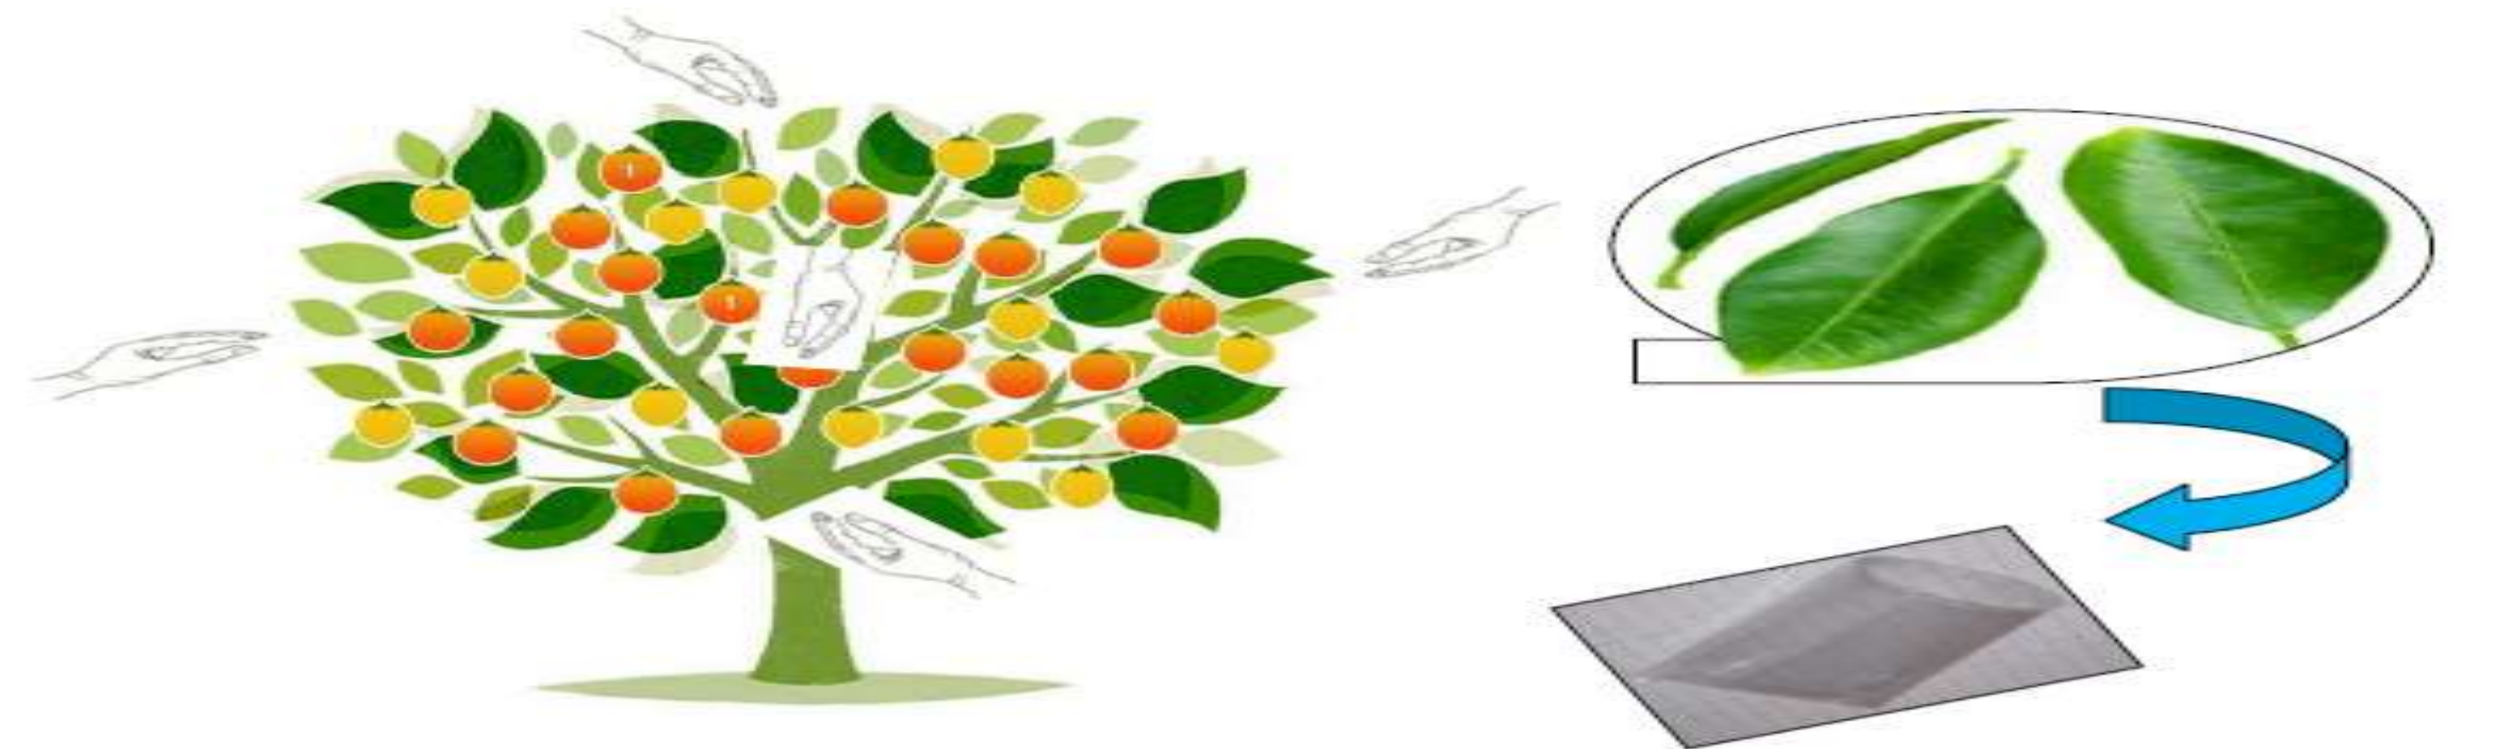

Fig1: Representative diagram of sampling method

## Lifestyle of parasitoids

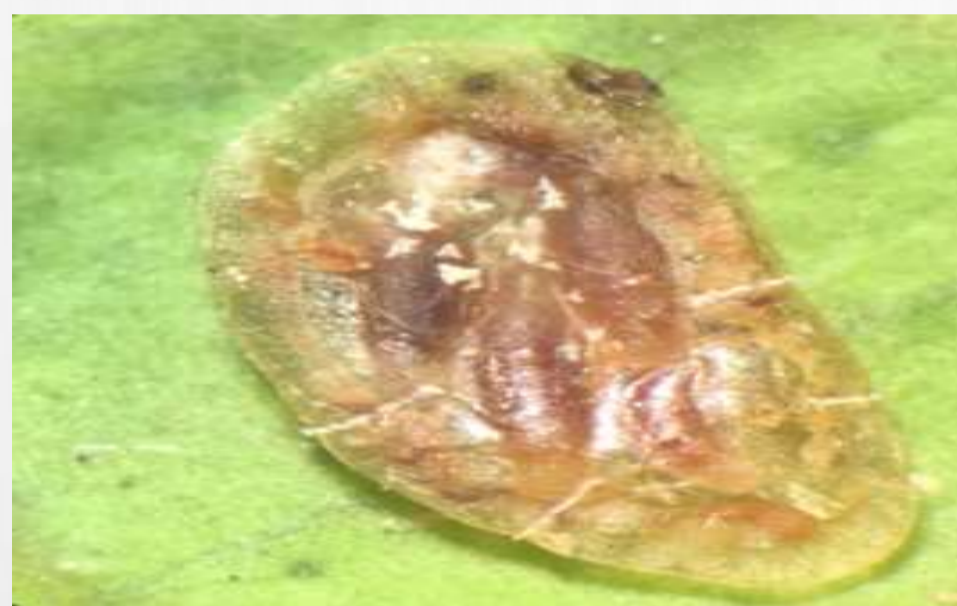

Fig 2: Gregarious parasitoid

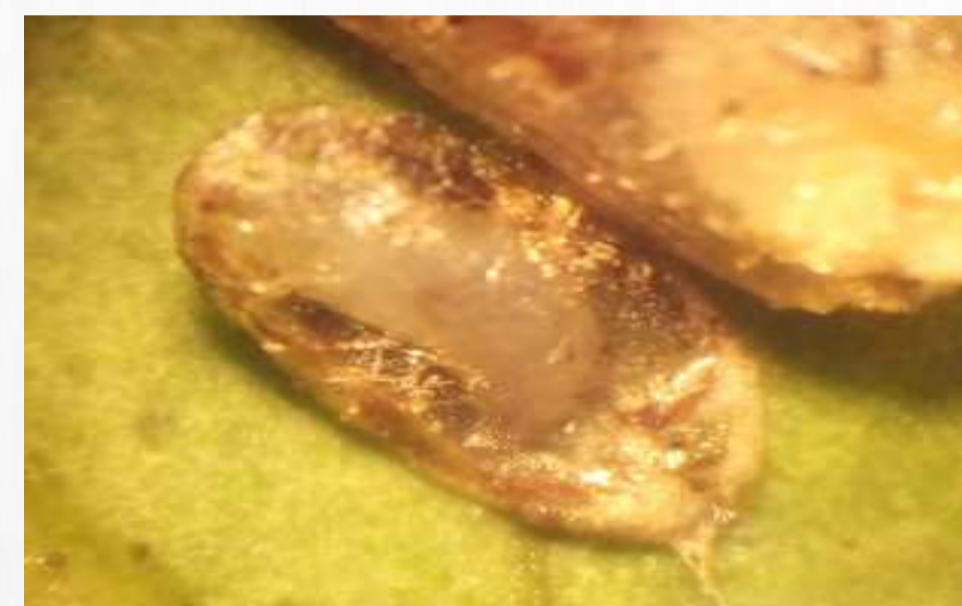

Fig 3: Solitary parasitoid

## Some species of parasitoids with their host

### 1: Leaf miner host

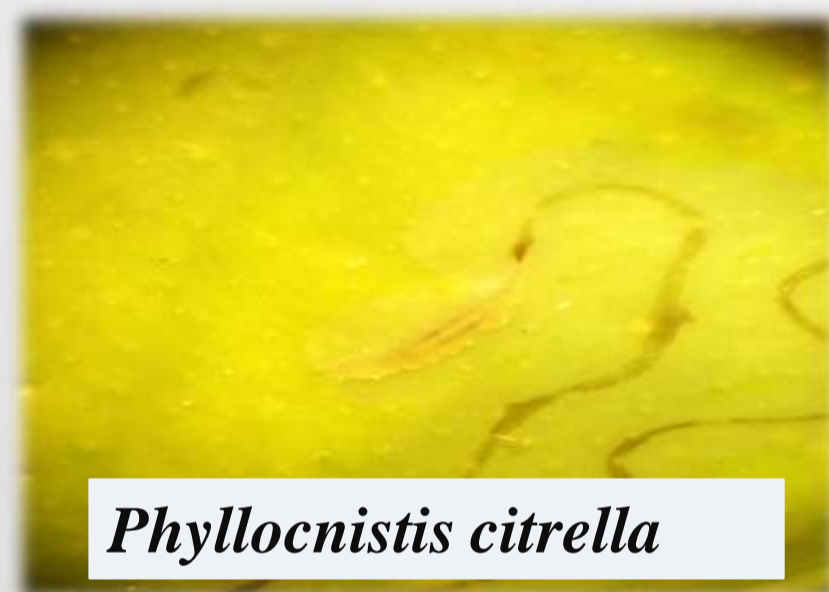

*Phyllocnistis citrella*

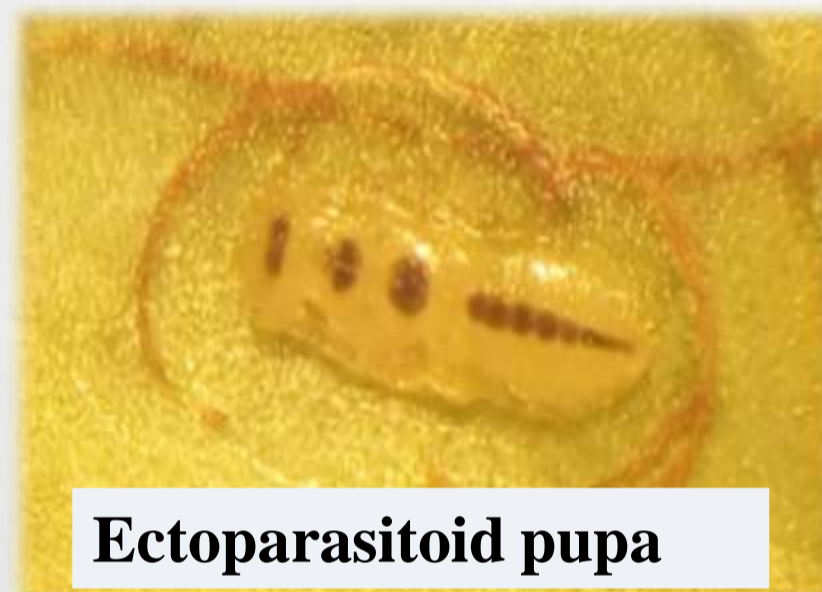

Ectoparasitoid pupa

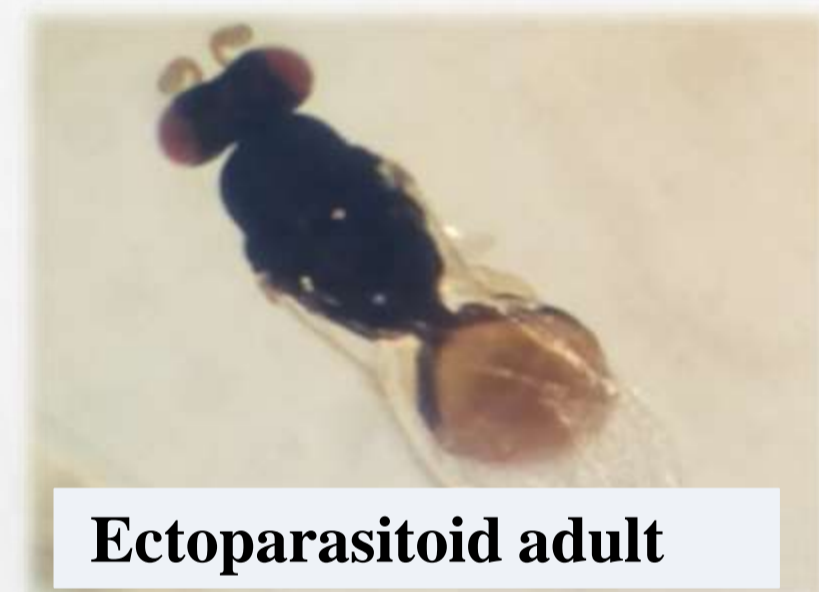

Ectoparasitoid adult

### 2: Cochineal host

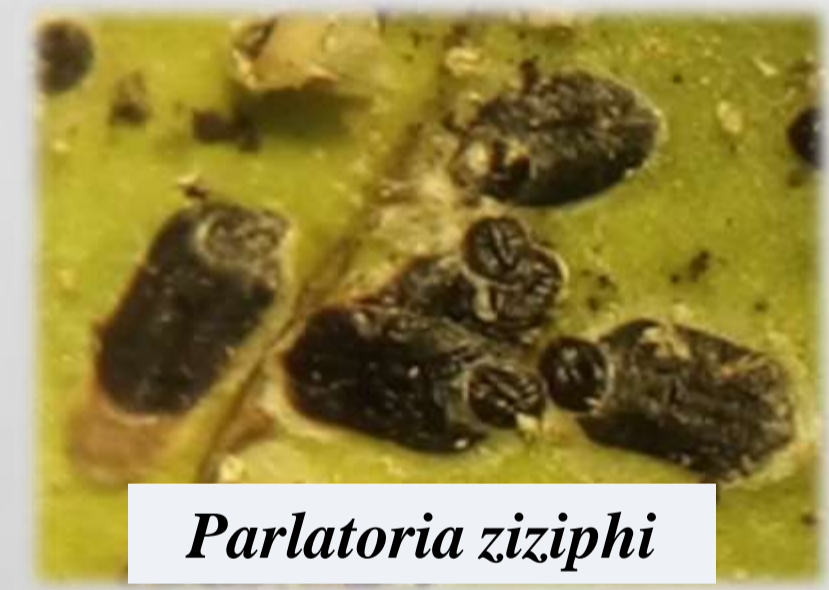

*Parlatoria ziziphi*

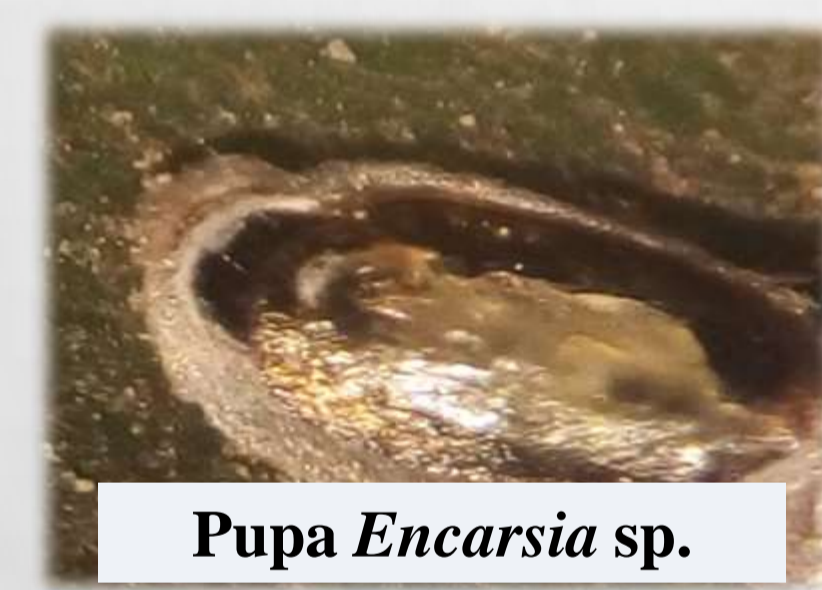

Pupa *Encarsia* sp.

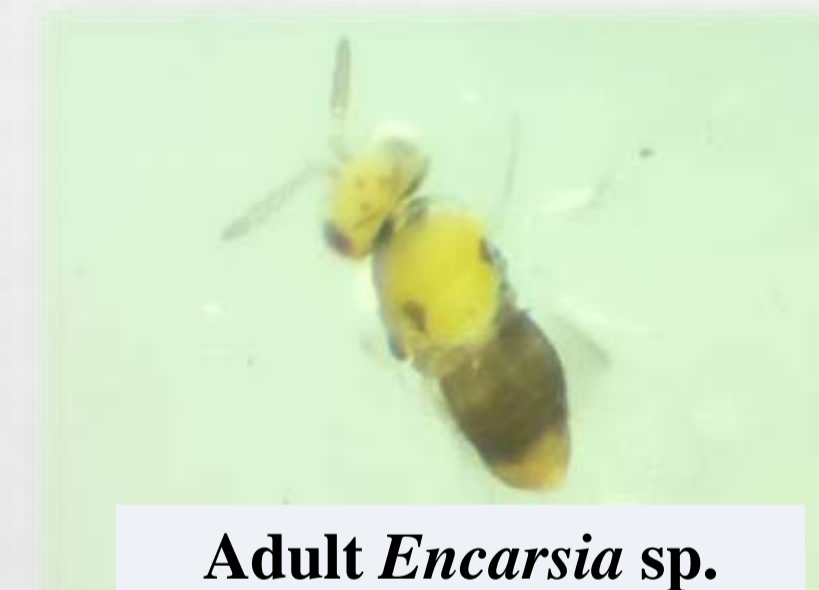

Adult *Encarsia* sp.

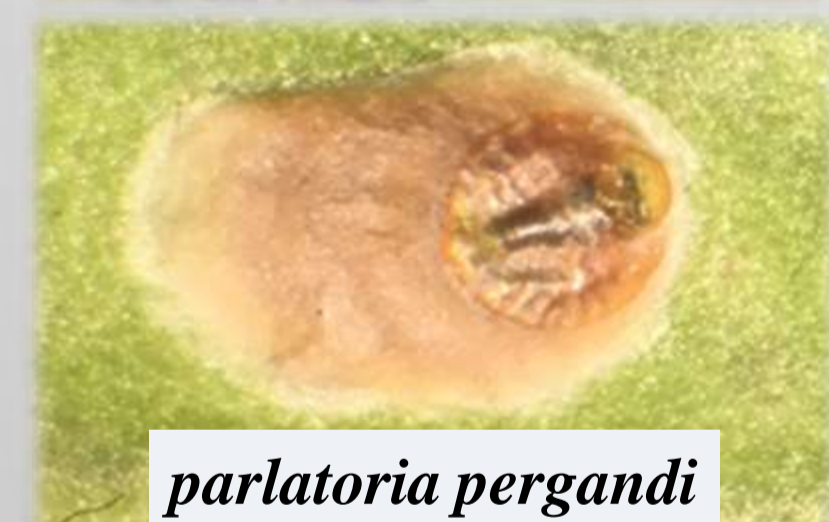

*parlatoria pergandi*

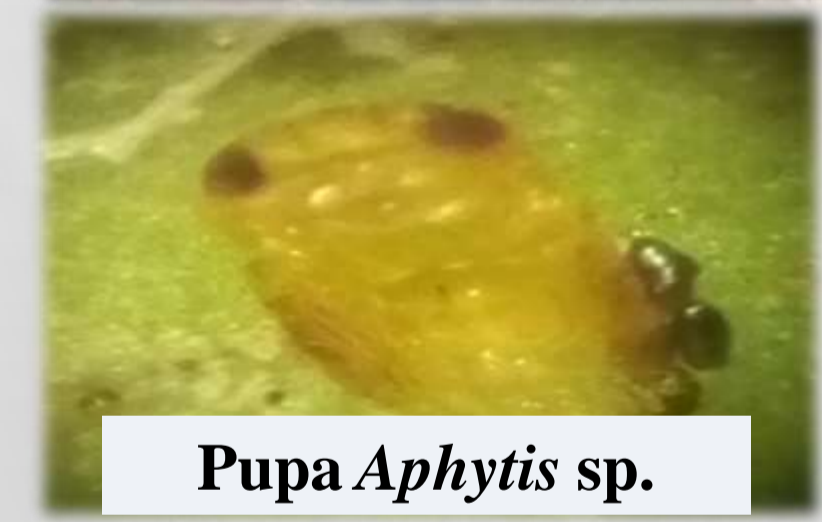

Pupa *Aphytis* sp.

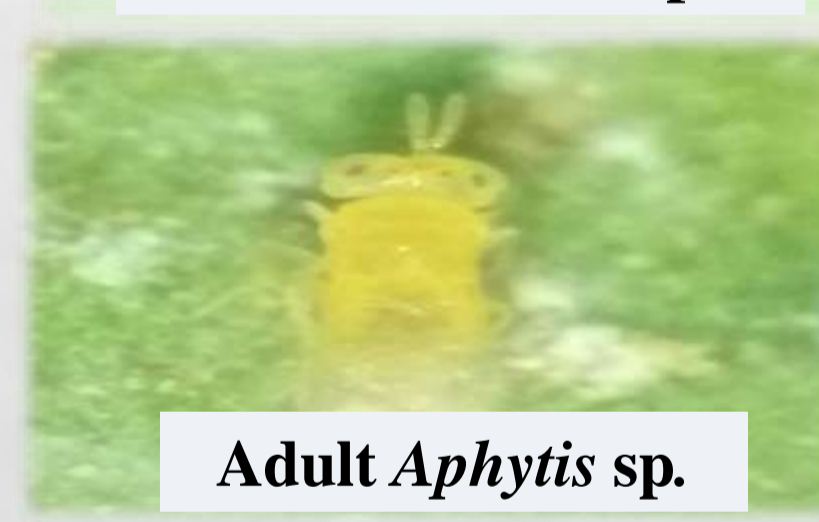

Adult *Aphytis* sp.

### 3: Aphid host

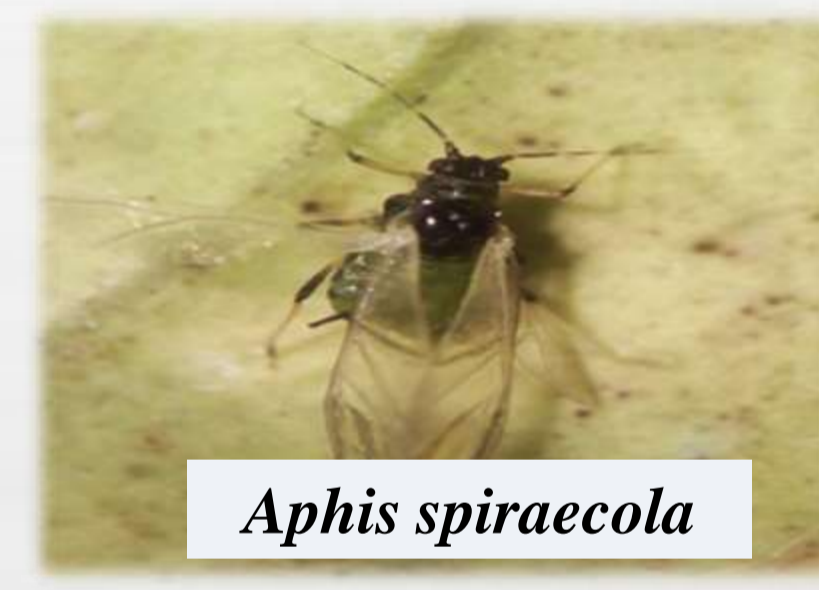

*Aphis spiraeicola*

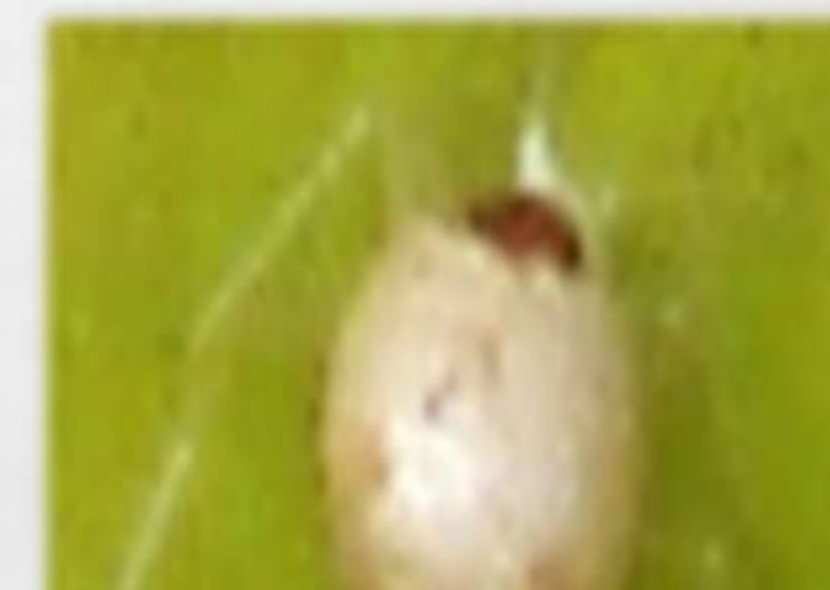

Mummy of aphid

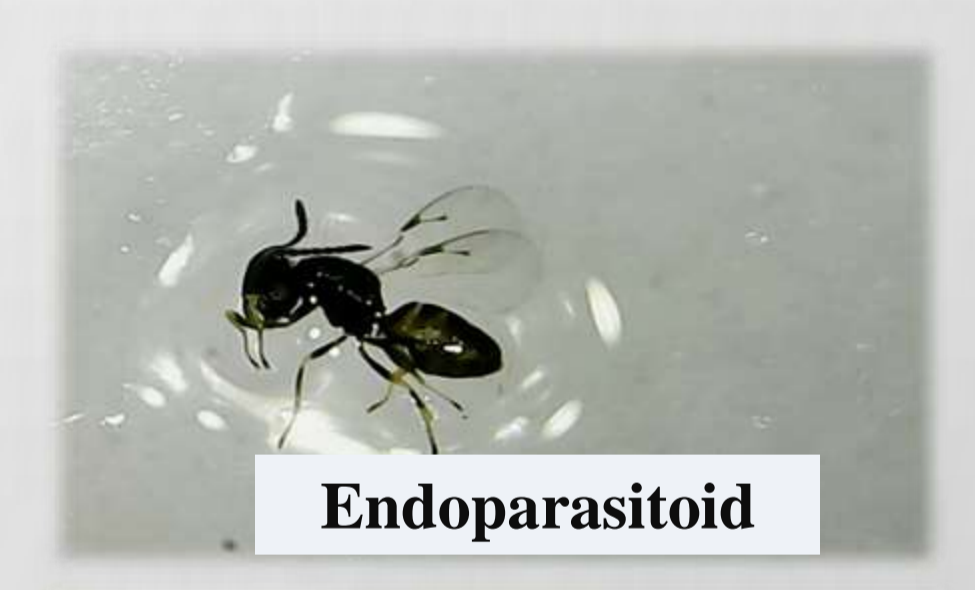

Endoparasitoid

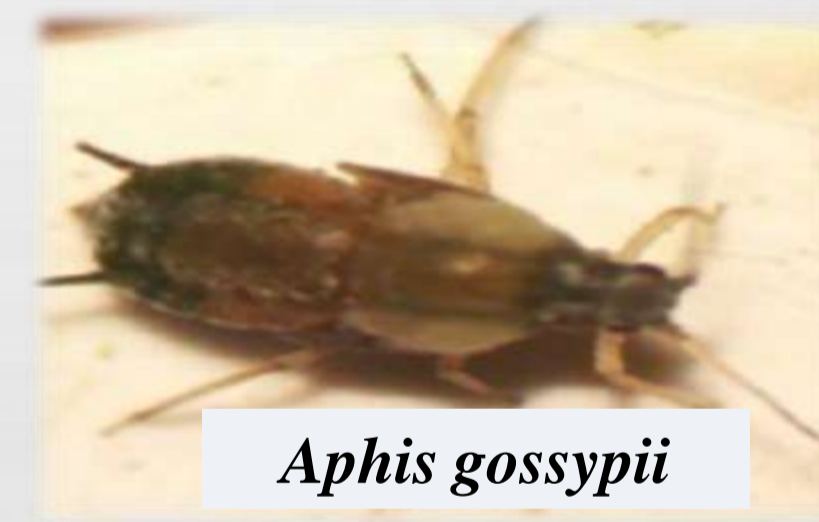

*Aphis gossypii*

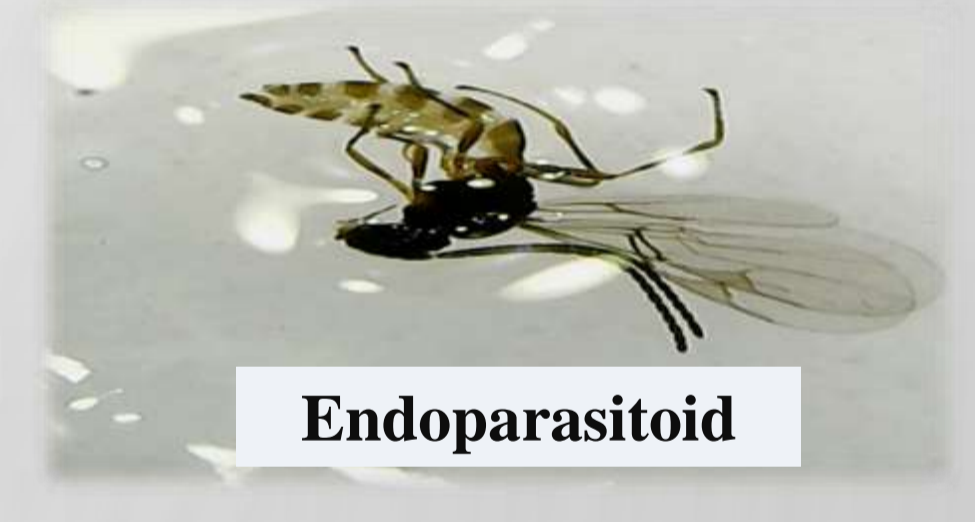

Endoparasitoid

## Results:

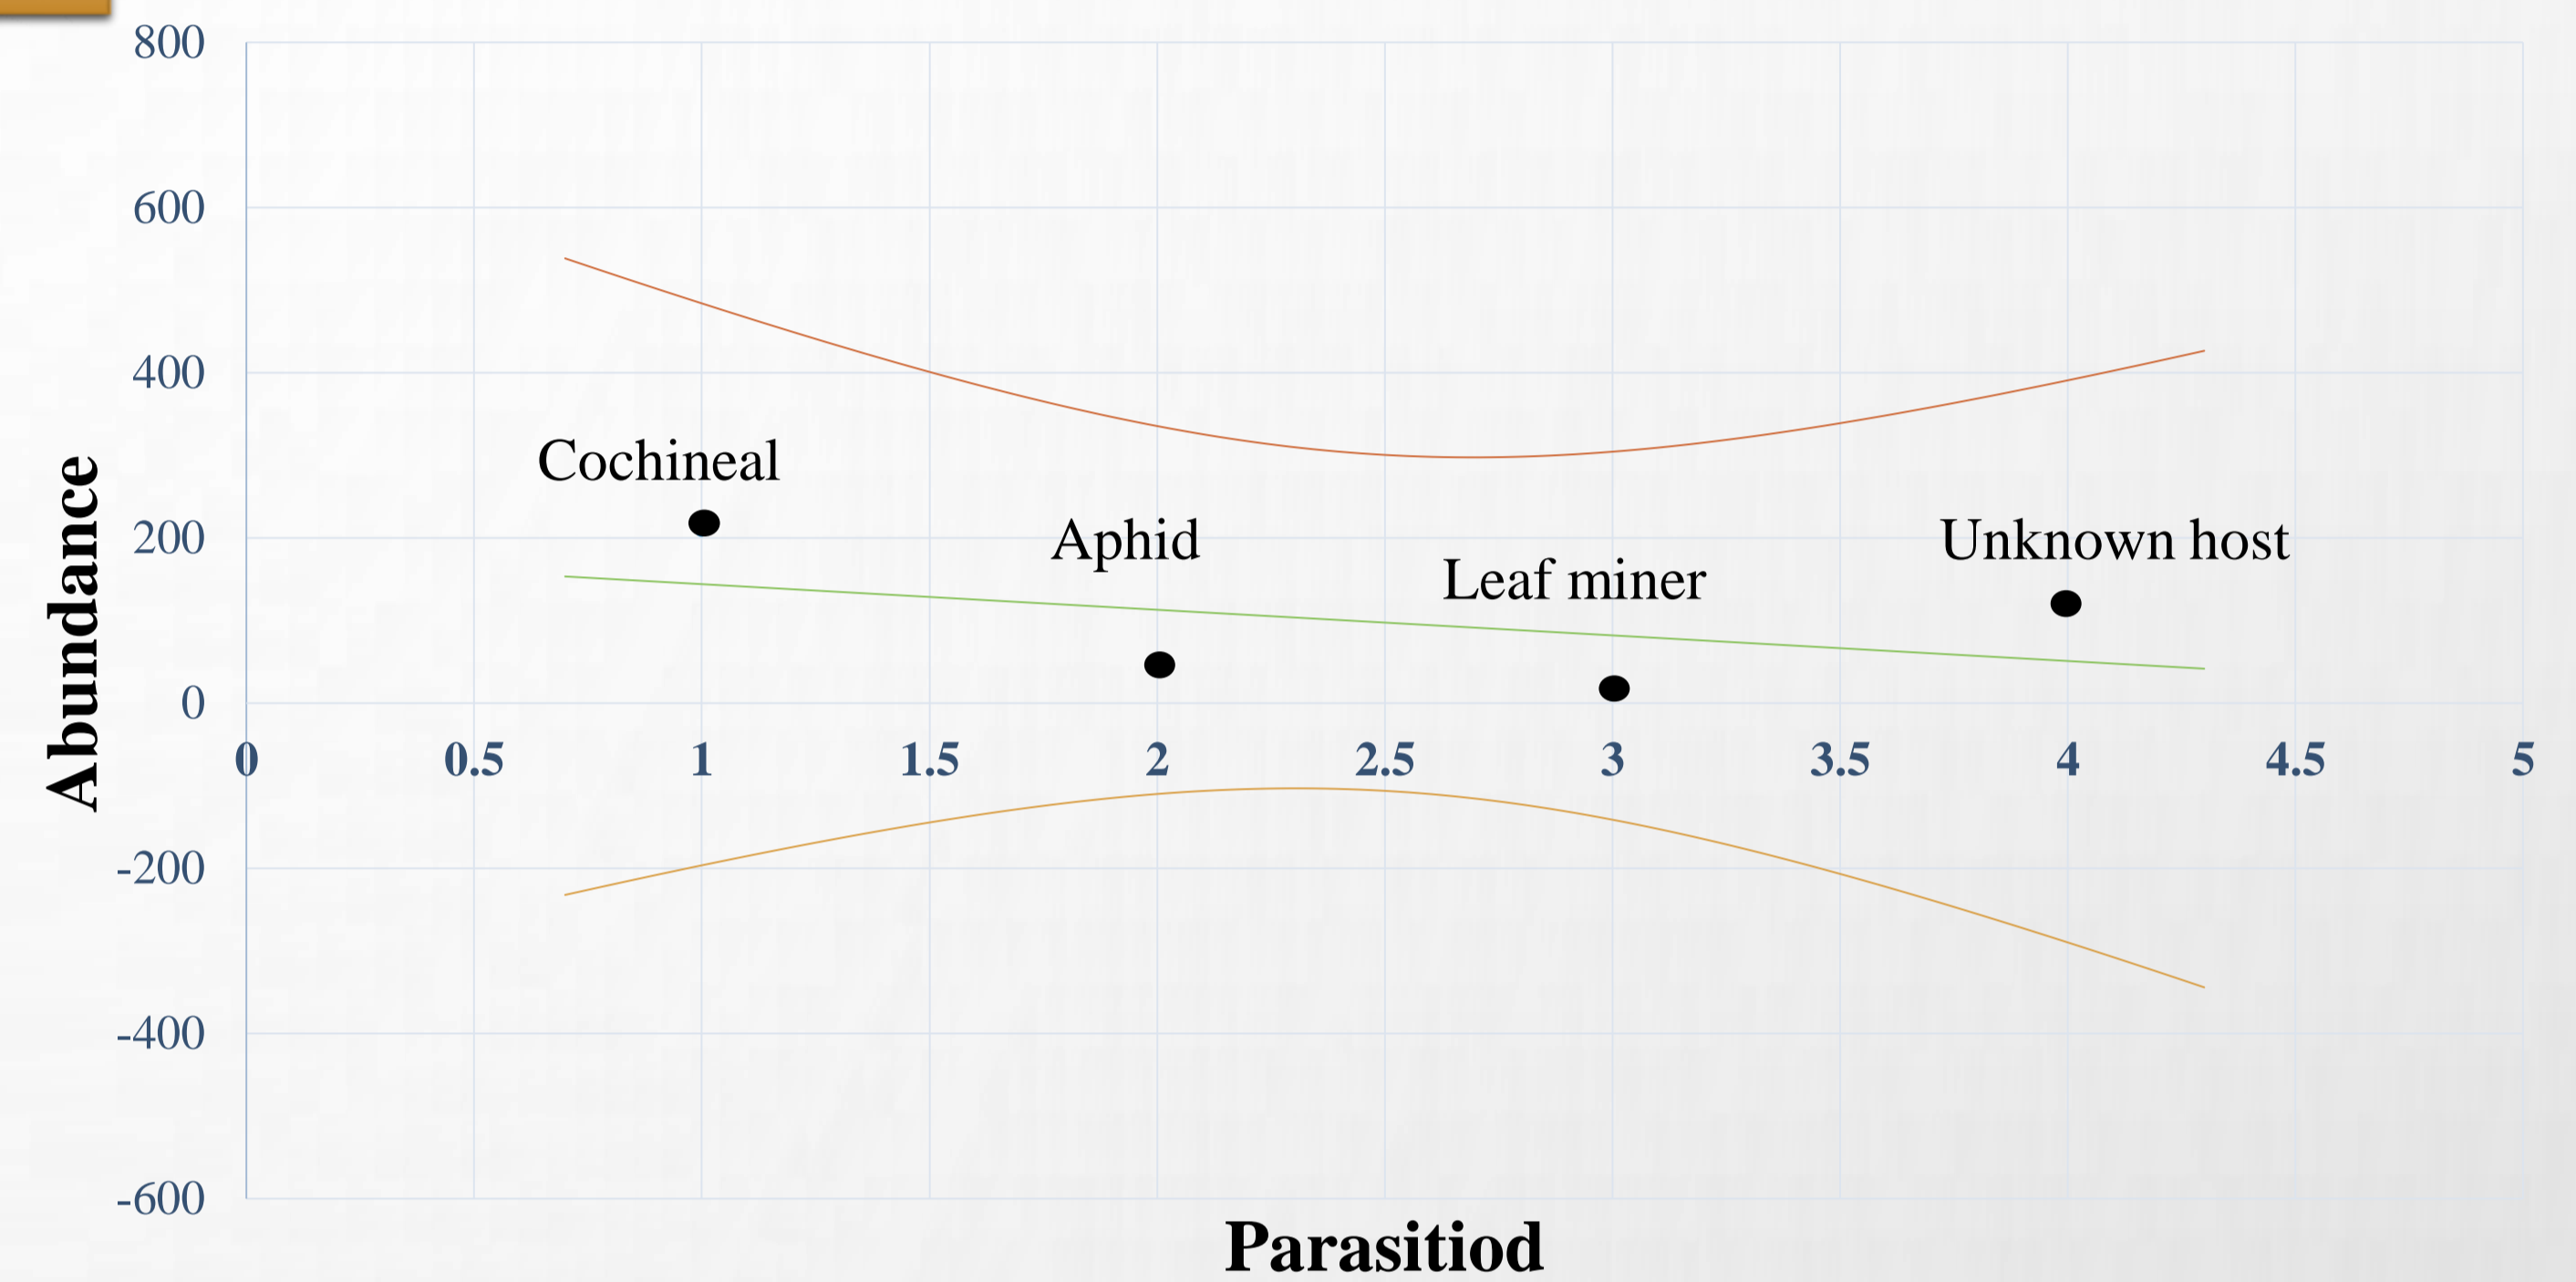

Fig 4: Parasitoid abundance per host

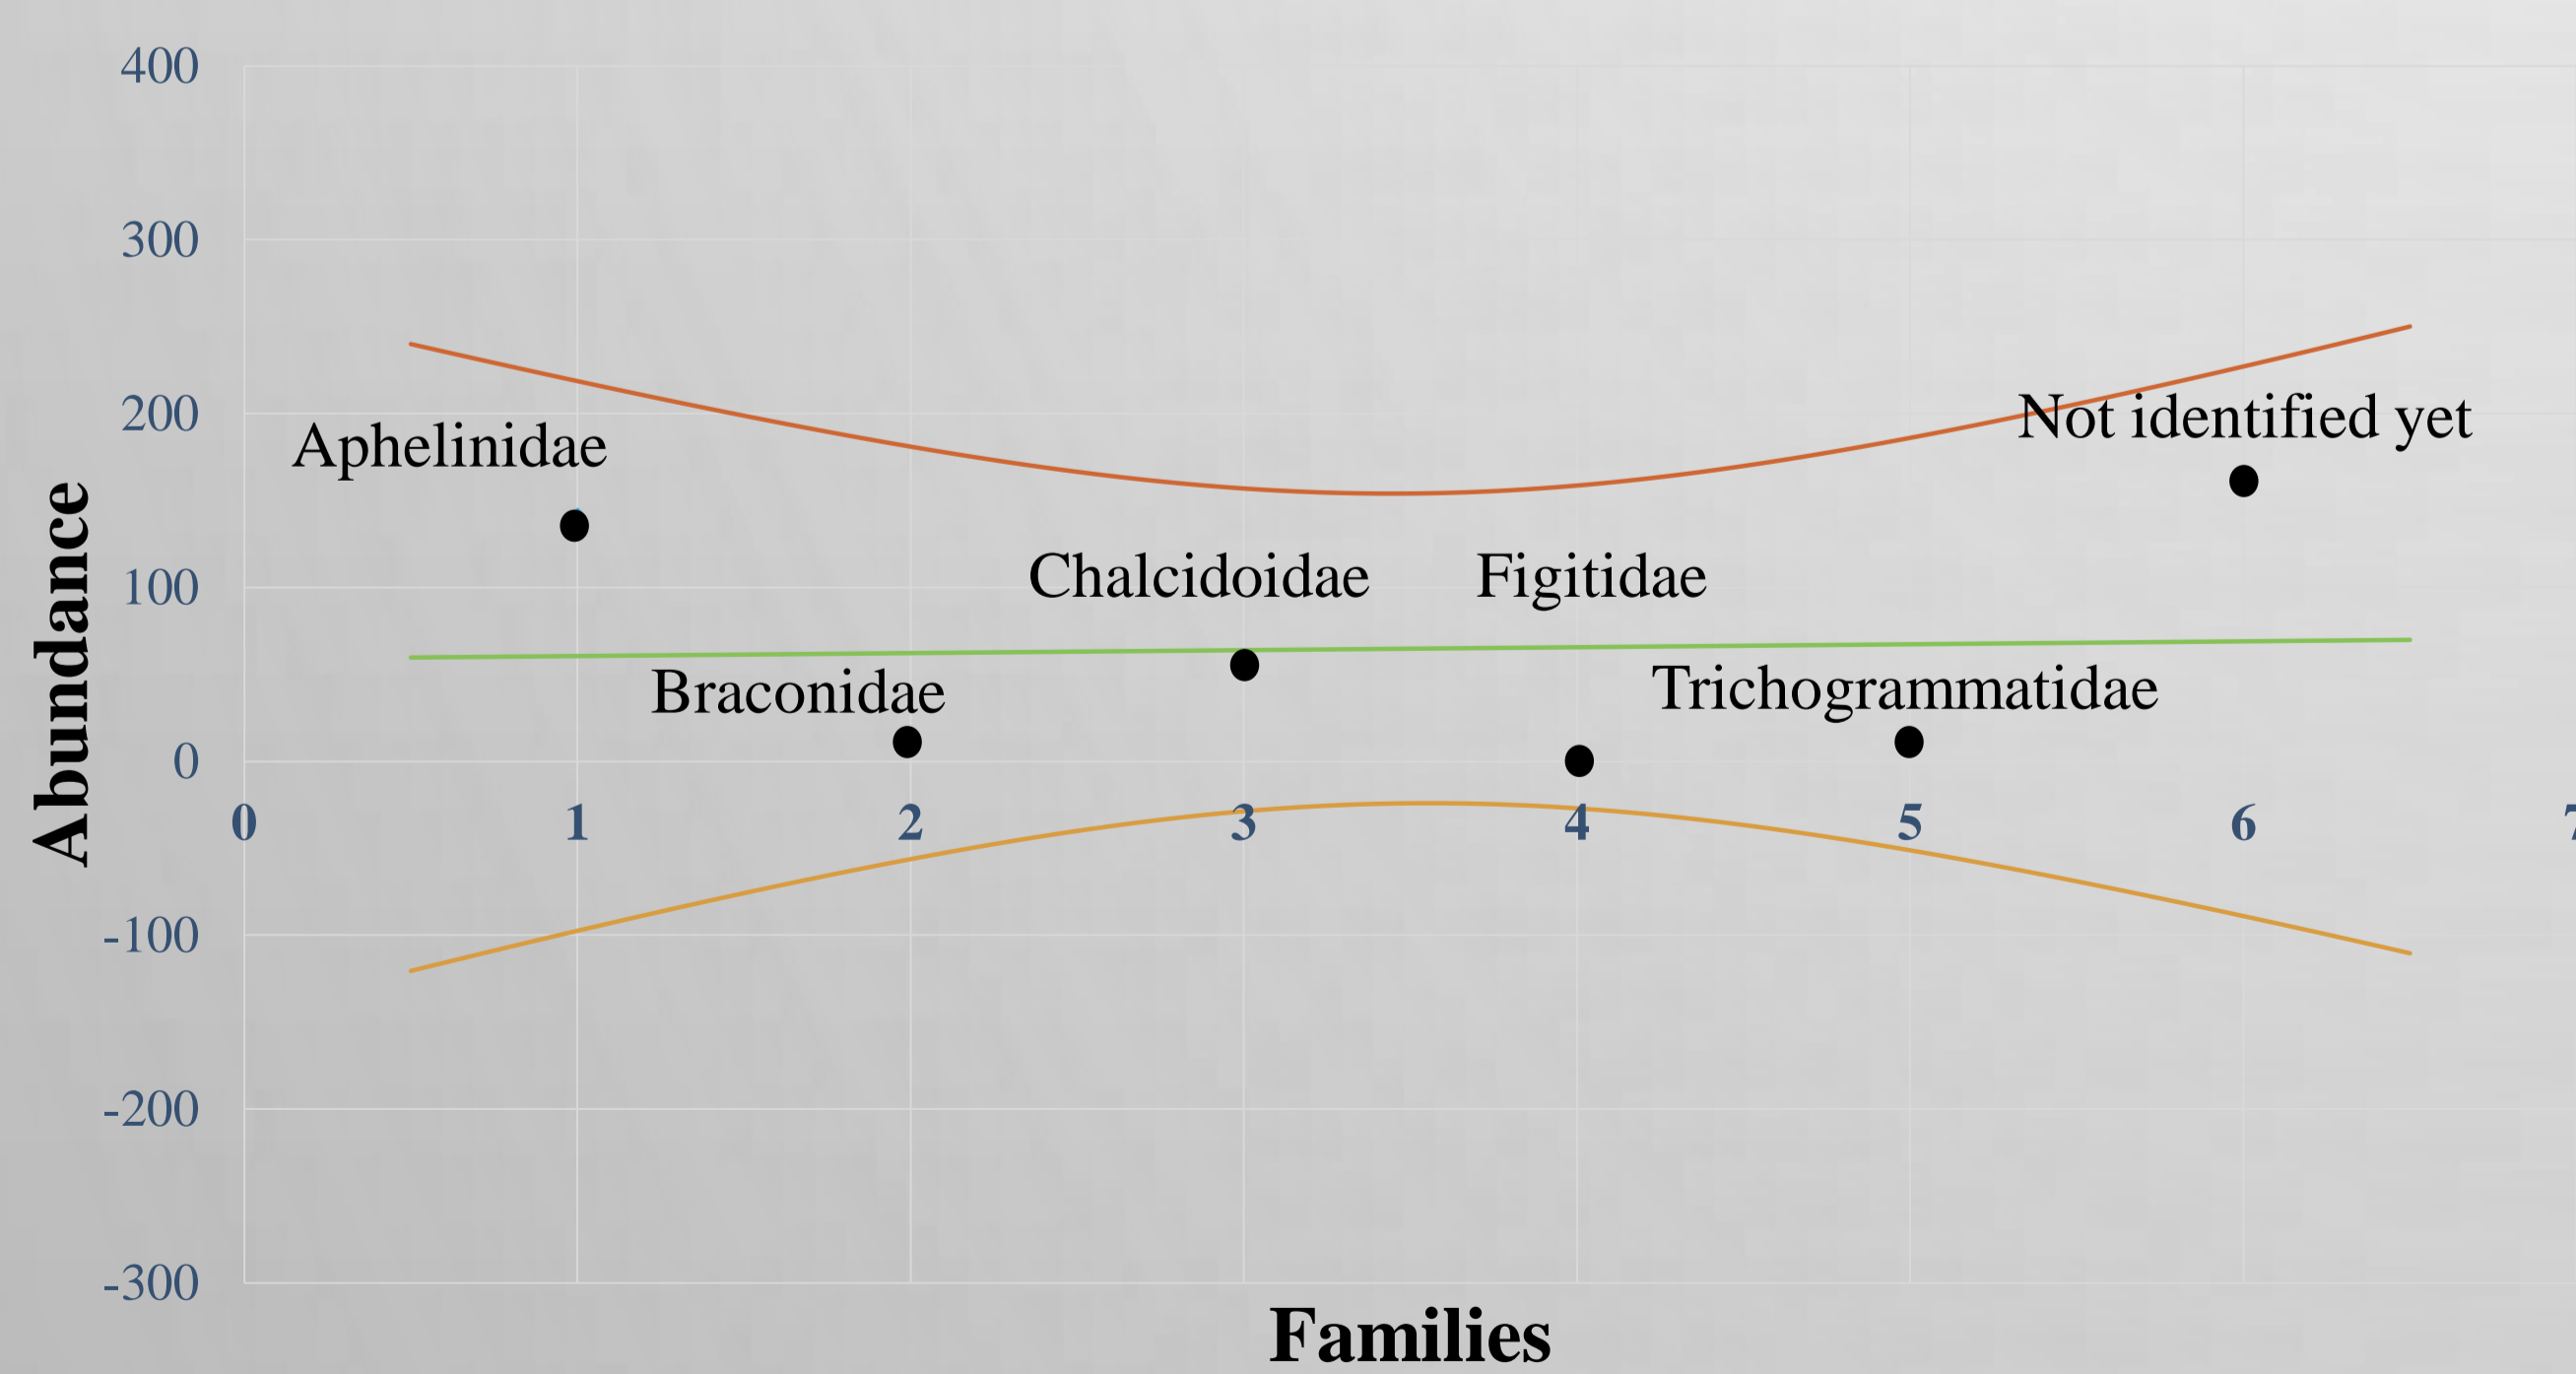

Fig 5: Parasitoid abundance per families

Our findings are similar to those of Elekçolu, 2007 in genus *Aphytis*, while are different in *Trichogrammatidae*, *Braconidae*, *Chalcidoidea*, *Figitidae* families. Despite sharing the same braconidae family as Vayssières 's, the genera discovered in this study are distinct. In the genus he discovered with ours, Molina-Ochoa 's is radically different.

## Conclusion

Citrus orchards of the study location have an unusual auxiliary fauna that plays an essential role in the control of dangerous insect outbreaks. Citrus pest biological control in the Mazagran region, possibly using auxiliaries developed through suitable breeding and release tactics. On the other hand, we must rationalize the chemical applications in our orchards to protect these auxiliaries based on the temperature, duration of release, and number of persons of each auxiliary. These findings could be enough to achieve successful biocontrol.

## Acknowledgment

General Directorate of Scientific Research and Technological Development financially supported this study.

- Strain, Host. 2019. "Rapid and Differential Evolution of the Venom Composition of a Parasitoid Wasp Depending on the." *Toxins* 2019, 11(11), 629.
- Vayssières JF, Wharton R, Adandonon A, Sinzogan A. Preliminary inventory of parasitoids associated with fruit flies in mangoes, guavas, cashew pepper and wild fruit crops in Benin. *BioControl*. 2011;56(1):35-43.
- Whitfield JB. Phylogenetic Insights into the Evolution of Parasitism in Hymenoptera. *Adv Parasitol*. 2003;54(February 2003):69-100.

- Burke GR, Thomas SA, Eum JH, Strand MR. Mutualistic Polydnnaviruses Share Essential Replication Gene Functions with Pathogenic Ancestors. *PLoS Pathog*. 2013;9(5):15-20.
- Molina-Ochoa J, Carpenter JE, Heinrichs EA, Foster JE. Parasitoids and parasites of *Spodoptera frugiperda* (Lepidoptera: Noctuidae) in the Americas and Caribbean Basin: An inventory. *Florida Entomol*. 2003;86(3):254-89.
- Poirié M, Colinet D, Gatti JL. Insights into function and evolution of parasitoid wasp venoms. *Curr Opin Insect Sci*. 2014;6:52-60.
